# Supplementary material for: Induced Packaging of Cellular MicroRNAs into HIV-1 Virions Can Inhibit Infectivity
Source: PubMed Central journal article supplement (PMC5241401; doi:10.1128/mbio.02125-16), 2017-01-17
Supplement: mbo002173149sf4.pdf [file mbo002173149sf4.pdf]

**miR-155:**

5' -UUA AUGCUAAUCGUGAUAGGGGU-3'

**miR-155PT target:**

5' -ACCCCTATCACGATTAGCATTAaggaaaaggACCCCTATCACGATTAGCATTA-3'

**miR-155BT target:**

5' -ACCCCTATCA**AT**ATTAGCATTAaggaaaaggACCCCTATCA**AT**ATTAGCATTA-3'

**miR-92a:**

5' -UAUUGCACUUGUCCCGGCCUGU-3'

**miR-92aPT target:**

5' -ACAGGCCGGGACAAGTGCAATAaggaaaaggACAGGCCGGGACAAGTGCAATA-3'

**miR-92aBT target:**

5' -ACAGGCCGGG**T**CAAGTGCAATAaggaaaaggACAGGCCGGG**T**CAAGTGCAATA-3'

**RAN (random) insert:**

5' -CATGCATCTAGAGGGCCCTATTCTATAGTGTCACCTAAATGCTAGAGCTCGCTGGTTCG-3'
